# Supplementary material
Source: PubMed Central journal article supplement (PMC2821987)

A

| Genotype                       | Average DT length | Std Dev. | n |
|--------------------------------|-------------------|----------|---|
| wild type                      | 417               | 12       | 6 |
| <i>yrt</i>                     | 476               | 22       | 7 |
| <i>yrt M/Z</i>                 | 470               | 23       | 5 |
| <i>da-gal4 UAS-crb 1d</i>      | 456               | 13       | 6 |
| <i>yrt crb/yrt +</i>           | 400               | 16       | 5 |
| <i>bt-gal4 UAS-crb 1d yrt+</i> | 488               | 23       | 5 |
| <i>cora</i>                    | 464               | 17       | 6 |
| <i>cora crb/cora +</i>         | 411               | 13       | 5 |
| <i>verm</i>                    | 472               | 17       | 6 |
| <i>verm crb/verm +</i>         | 475               | 15       | 5 |
| <i>sinu</i>                    | 498               | 24       | 6 |
| <i>sinu crb/sinu +</i>         | 489               | 21       | 5 |

B

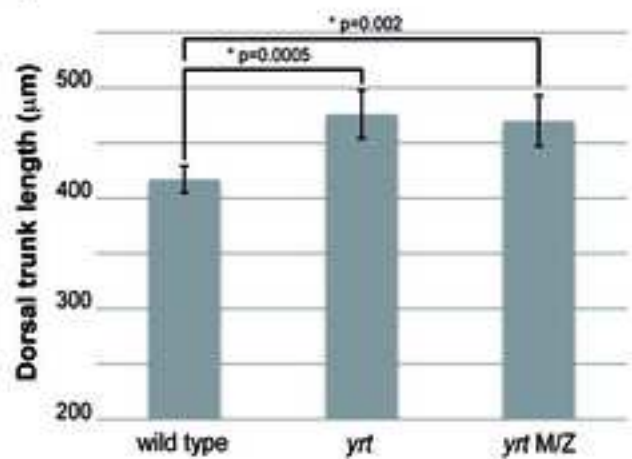

C

| Genotype                  | Average DT diameter | Std Dev. | n |
|---------------------------|---------------------|----------|---|
| wild type                 | 9.1                 | 0.6      | 6 |
| <i>yrt</i>                | 12.2                | 0.9      | 7 |
| <i>yrt M/Z</i>            | 12.7                | 0.5      | 5 |
| <i>da-gal4 UAS-crb 1d</i> | 12.3                | 1.0      | 6 |
| <i>cora</i>               | 12.4                | 1.1      | 6 |

D

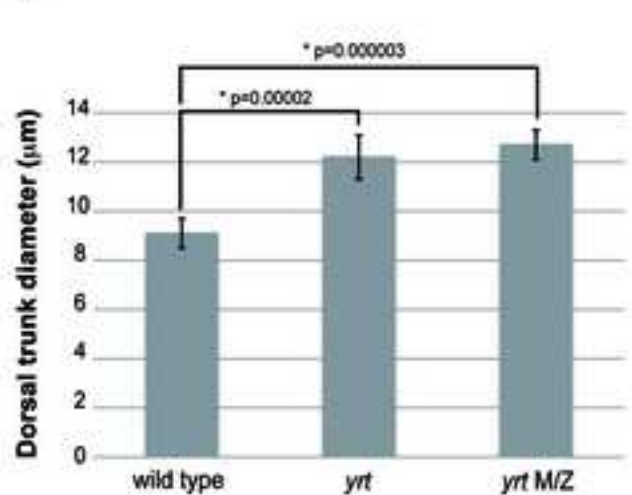

E

| Genotype                  | Average number of cells/ Tracheal segment | Std Dev. | n  |
|---------------------------|-------------------------------------------|----------|----|
| wild type                 | 25.8                                      | 2.1      | 10 |
| <i>yrt</i>                | 25.6                                      | 1.5      | 10 |
| <i>yrt M/Z</i>            | 26.6                                      | 1.9      | 10 |
| <i>da-gal4 UAS-crb 1d</i> | 26.3                                      | 1.7      | 10 |
| <i>cora</i>               | 25.2                                      | 2.0      | 10 |

F

| Genotype                  | DT length/Embryo length ratio | Std Dev. | n |
|---------------------------|-------------------------------|----------|---|
| wild type                 | 0.83                          | 0.02     | 6 |
| <i>yrt</i>                | 0.97                          | 0.03     | 7 |
| <i>yrt M/Z</i>            | 0.99                          | 0.02     | 5 |
| <i>da-gal4 UAS-crb 1d</i> | 0.97                          | 0.03     | 6 |
| <i>cora</i>               | 1.01                          | 0.02     | 6 |

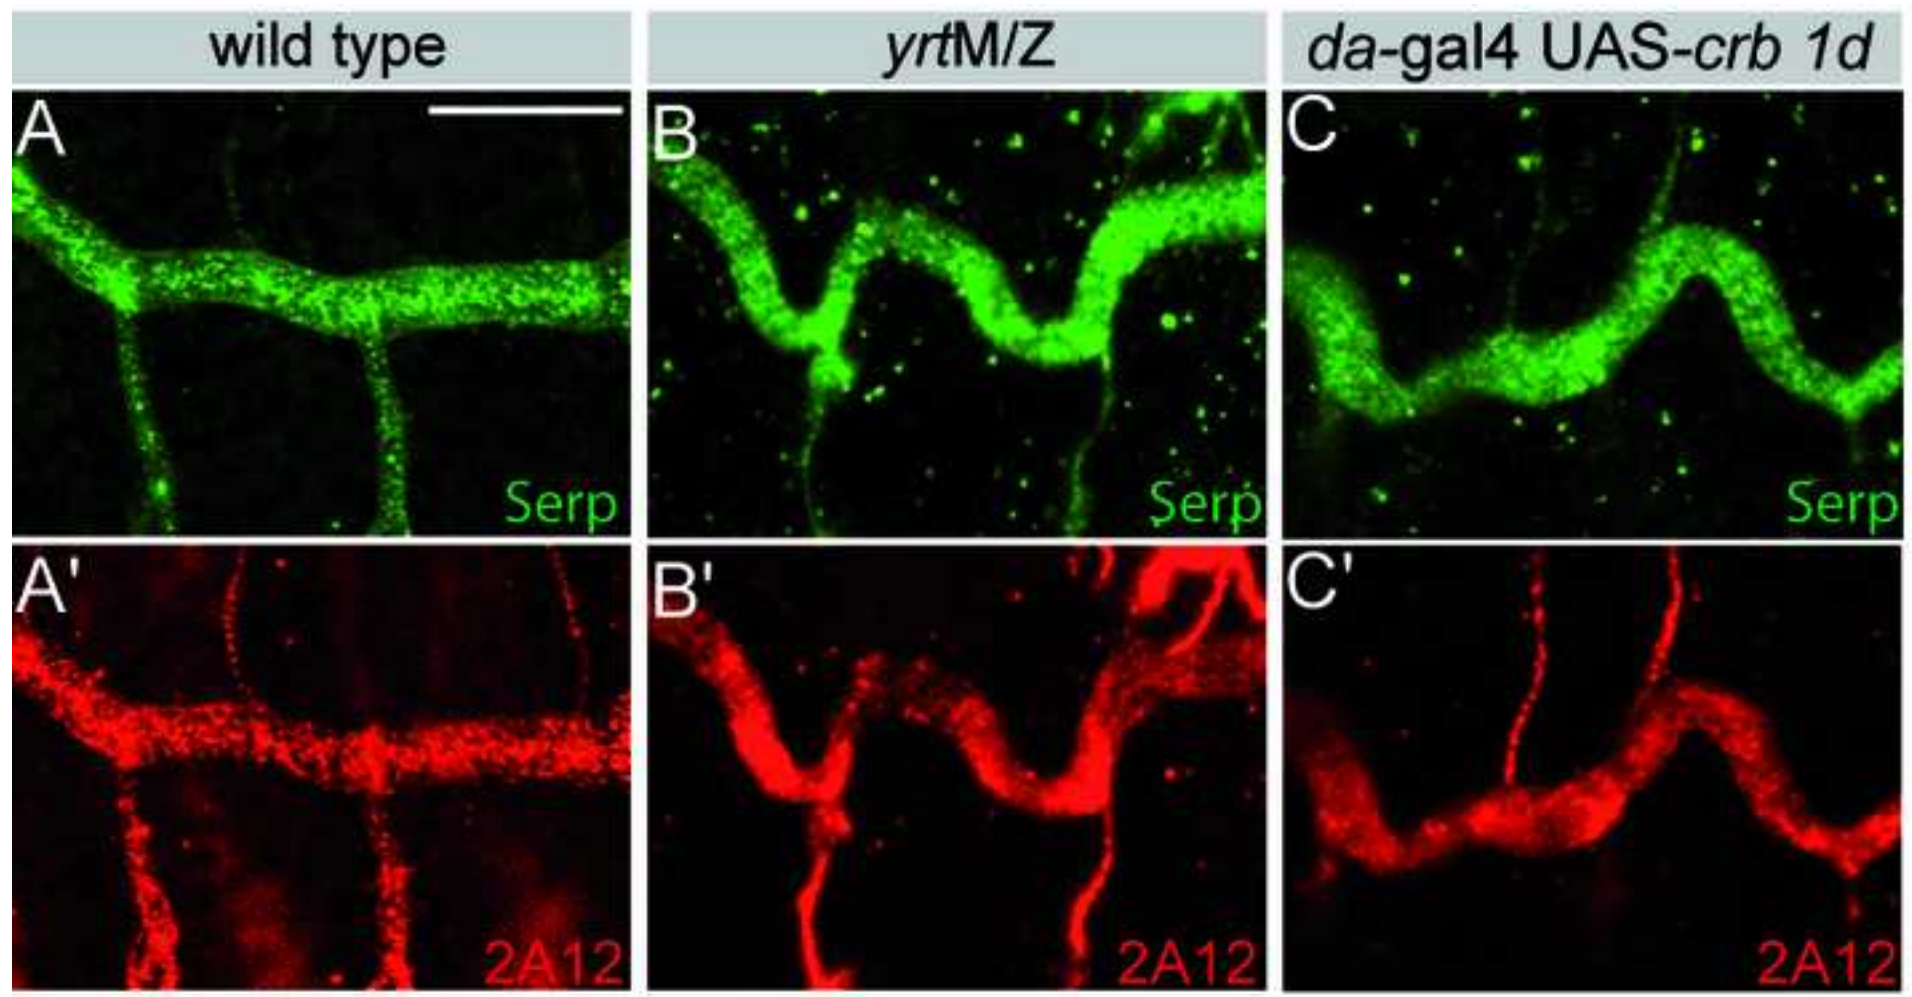

Laprise et al. Figure S2

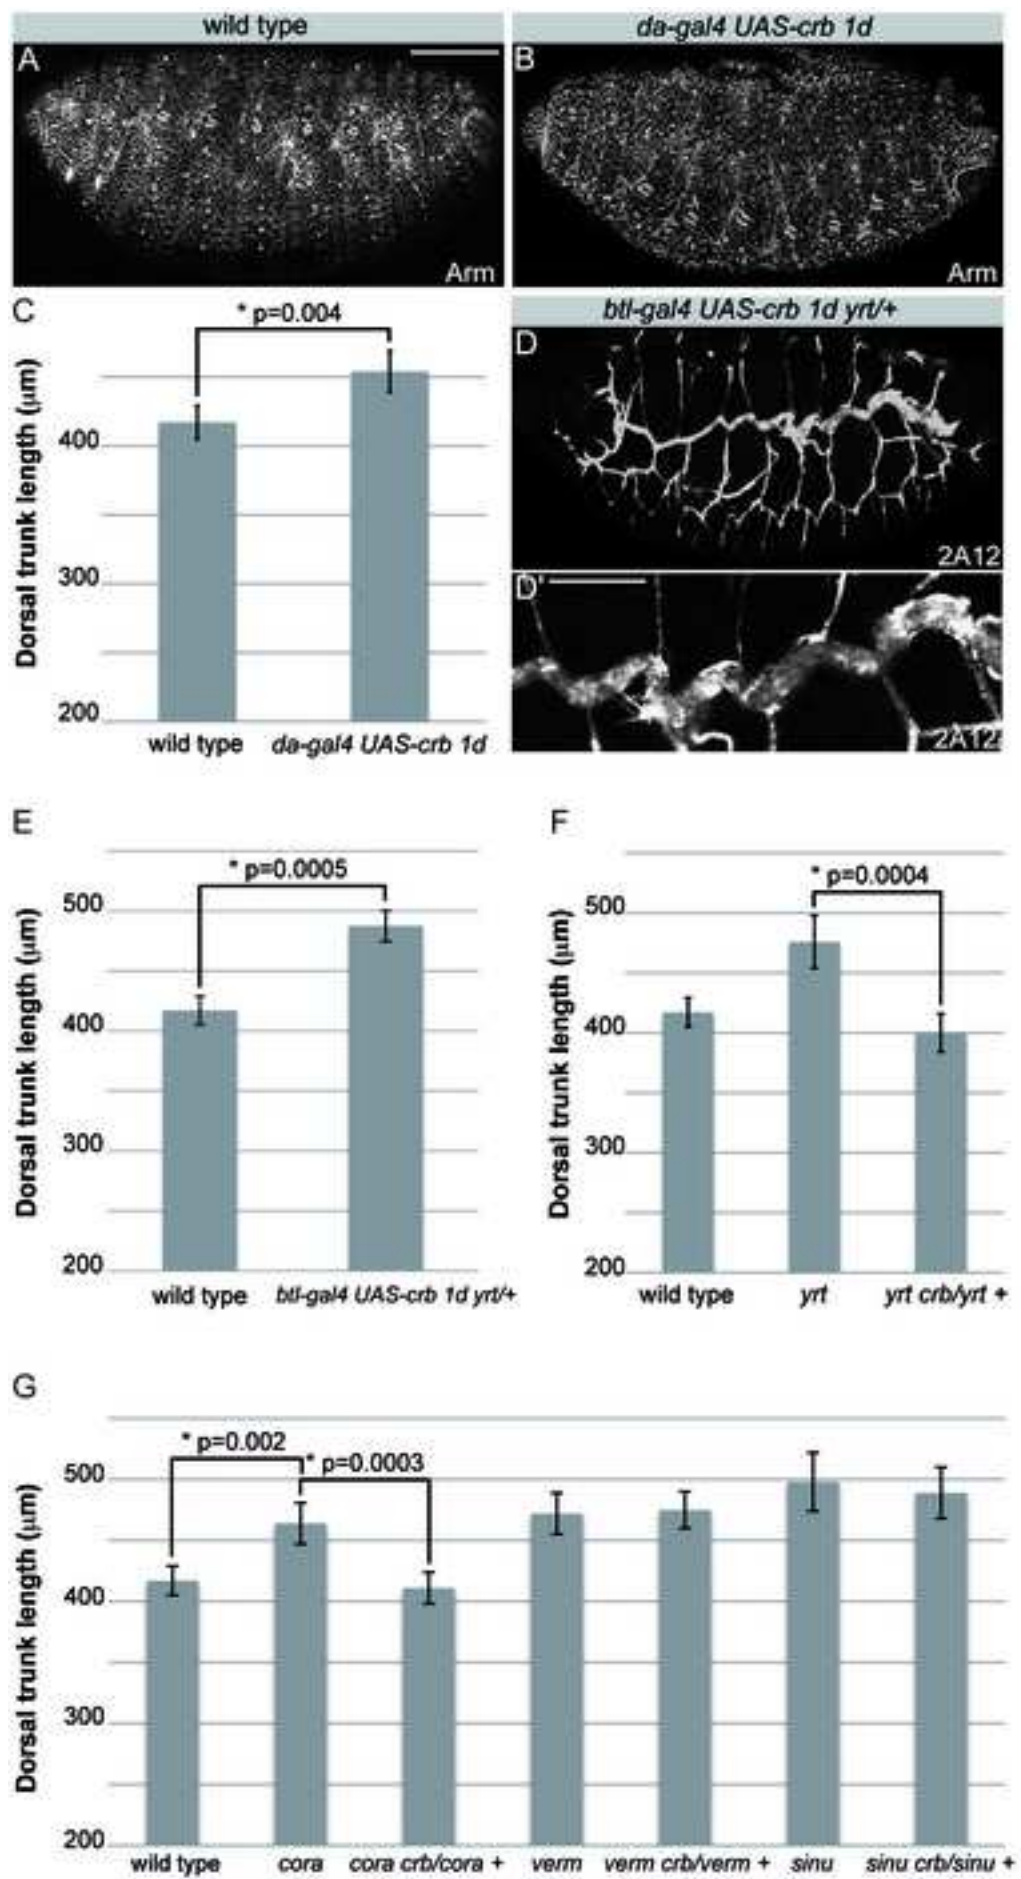

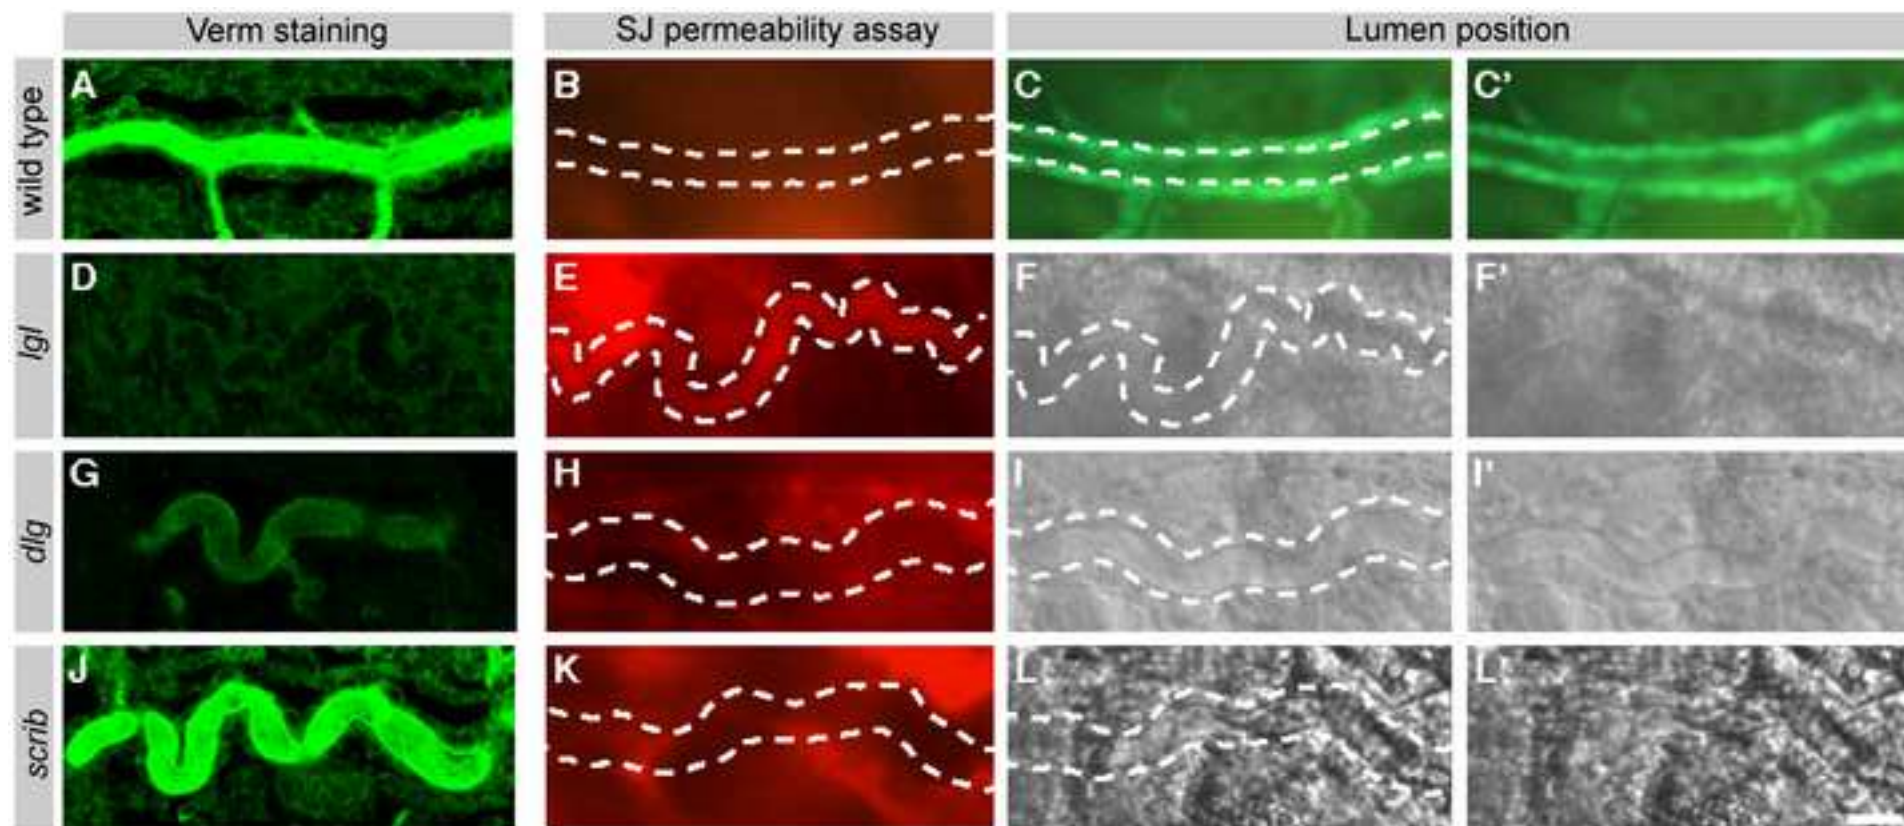

Laprise et al. Figure S4

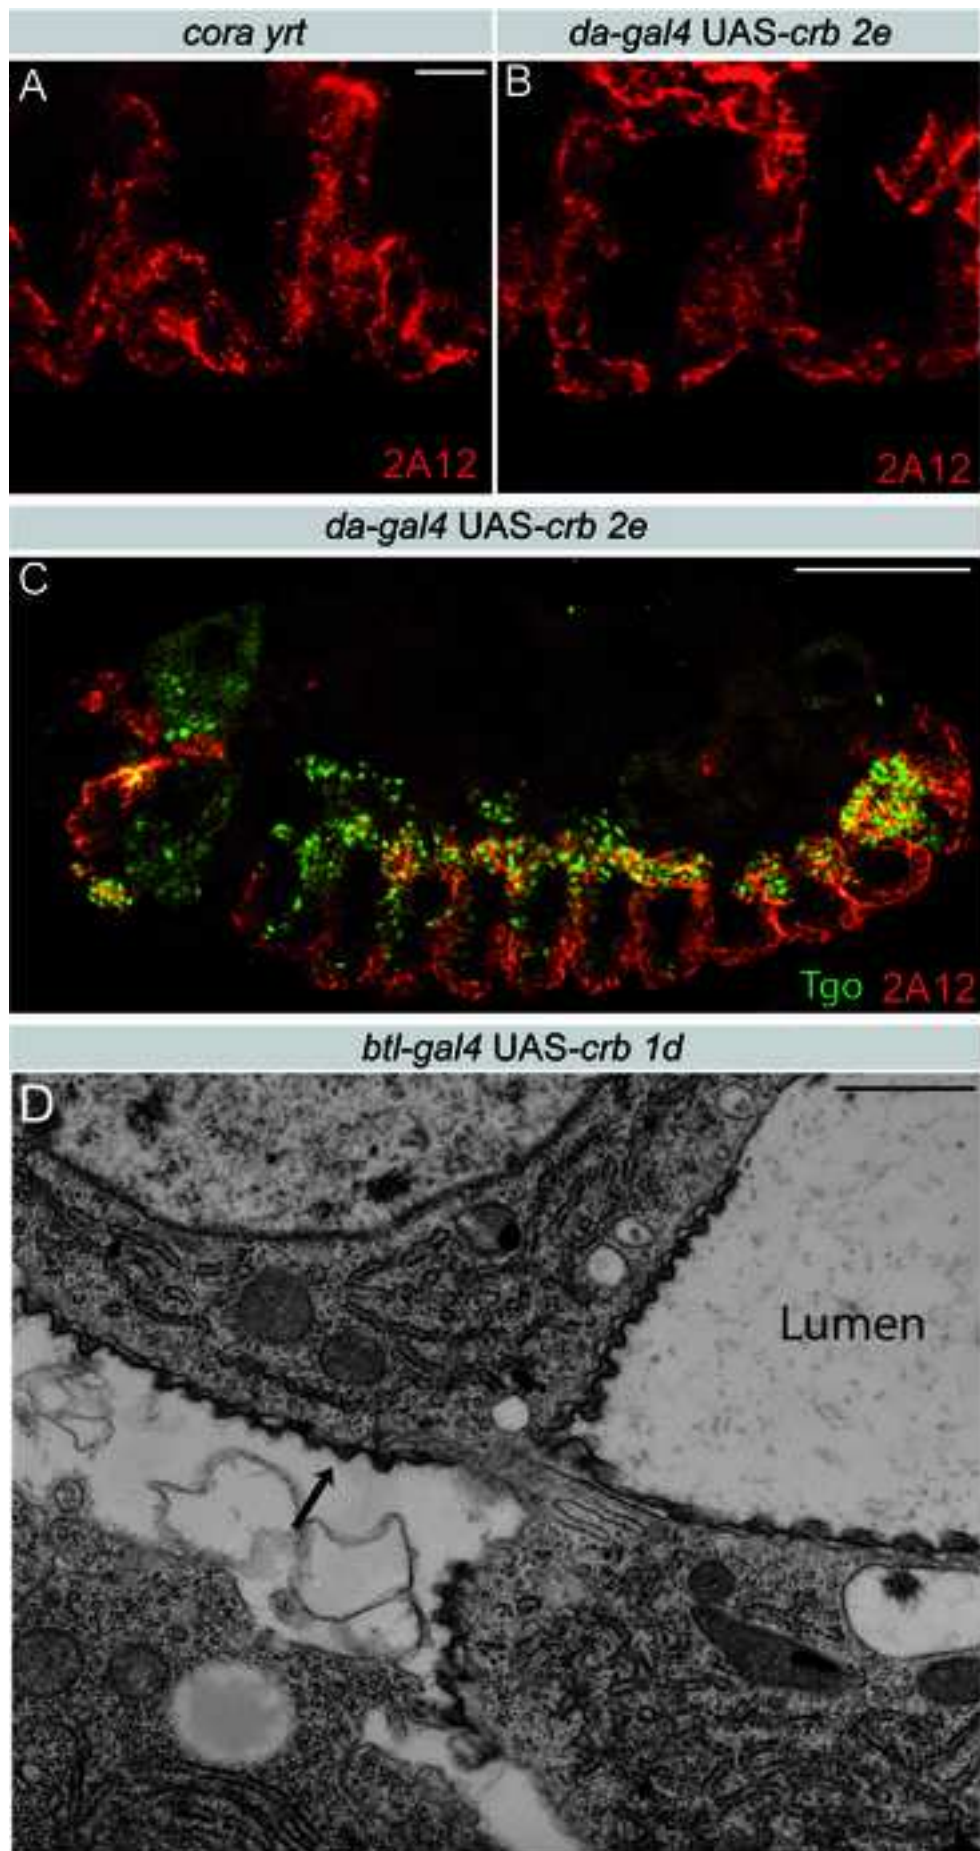

Supplement: NIHMS166349-supplement-01.pdf [file NIHMS166349-supplement-01.pdf]
